# Supplementary material
Source: PubMed Central journal article supplement (PMC6437506)
Supplement: AAC.02492-18-s0001.pdf [file AAC.02492-18-s0001.pdf]

**TABLE S1 Uptake of [<sup>3</sup>H]doravirine in human hepatocytes**

| Substrate                            | Time (min) | Without inhibitors<br>(pmol/10 <sup>6</sup> cells/min) | With inhibitors<br>(pmol/10 <sup>6</sup> cells/min) |
|--------------------------------------|------------|--------------------------------------------------------|-----------------------------------------------------|
| [ <sup>3</sup> H]E <sub>2</sub> 17βG | 5          | 37.7 ± 2.2                                             | 7.5 ± 0.3                                           |
| [ <sup>3</sup> H]CCK8                | 5          | 0.023 ± 0.001                                          | 0.006 ± 0.000                                       |
| [ <sup>3</sup> H]TCA                 | 5          | 169.6 ± 3.2                                            | 13.5 ± 0.7                                          |
| [ <sup>14</sup> C]TEA                | 5          | 8.7 ± 0.1                                              | 2.2 ± 0.1                                           |
| Doravirine                           | 0          | 17.4 ± 0.6                                             | 16.0 ± 0.5                                          |
|                                      | 1          | 65.7 ± 2.4                                             | 52.6 ± 3.3                                          |
|                                      | 2          | 80.1 ± 1.8                                             | 61.1 ± 0.5                                          |
|                                      | 5          | 91.9 ± 2.5                                             | 67.1 ± 1.7                                          |

[<sup>3</sup>H]E<sub>2</sub>17βG (1 μM), [<sup>3</sup>H]CCK8 (5 nM), [<sup>3</sup>H]TCA (1 μM) and [<sup>14</sup>C]TEA (1 μM) were used as control substrates and CsA (10 μM), rifamycin SV (10 μM), rifampin (100 μM) and quinidine (50 μM) as inhibitors.

Mean ± SEM values are listed (n=3).

CCK8, cholecystokinin-8; CsA, cyclosporine A; E<sub>2</sub>17βG, estradiol 17β-glucuronide;

TCA, taurocholic acid; TEA, tetraethylammonium.
